# Supplementary material
Source: Royal Society of Chemistry journal article supplement (https://www.rsc.org/suppdata/cc/1999/633/809275c.doc)
Supplement: Supplementary file 1 [file 809275c.doc]

**Highly electrophilic lanthanide complexes containing fluorinated amido ligands: multiple Ln...F interactions, agostic interactions and 6-arene coordination.**

Damon R. Click, Brian L. Scott and John G. Watkin*

*Chemical Science and Technology Division, Mail Stop J514, Los Alamos National Laboratory, Los Alamos, New Mexico, 87545. E-mail: jwatkin@lanl.gov.*

## SUPPLEMENTARY MATERIAL

# Experimental Details

***General Procedures and Techniques.***  All manipulations were carried out under an inert atmosphere of oxygen-free UHP grade argon using standard Schlenk techniques, or under oxygen-free helium in an Innovative Technologies drybox. Ln[N(SiMe3)2]3 complexes (Ln = Nd, Sm) were prepared by refluxing anhydrous LnCl3 with three equivs of sodium bis(trimethylsilyl)amide in THF, followed by crystallization from hexane. Pentafluoroaniline was purchased from Aldrich and used as received. N-trimethylsilylpentafluoroaniline1 and decafluorodiphenylamine2 were prepared as described previously. Solvents were degassed and distilled from sodium benzophenone ketyl under nitrogen. Benzene-*d6*, THF-*d8* and toluene-*d8* were degassed, dried over Na-K alloy, and then trap-to-trap distilled before use.

NMR spectra were recorded at 22°C on a Varian Unity 300 spectrometer. All 1H NMR chemical shifts are reported in ppm relative to the 1H impurity in benzene-*d6*, THF-*d8* or toluene-*d8*, set at  7.15, 1.73 and 2.09 ppm, respectively. 19F NMR chemical shifts are referenced to a hexafluorobenzene standard which was set at 126.9 ppm. Infrared spectra were recorded on a Digilab FTS-40 spectrometer. Solid-state spectra were taken as Nujol mulls between KBr plates. Elemental analyses were performed on a Perkin-Elmer 2400 CHN analyzer. Elemental analysis samples were prepared and sealed in tin capsules in the glovebox prior to combustion.

**Sm(NHC6F5)3(THF)3** (**2**). Sm[N(SiMe3)2]3 (1.00 g, 1.58 mmol) was dissolved in 10 mL of toluene and then a solution of pentafluoroaniline (0.868 g, 4.74 mmol) in toluene (5 mL) was added. The reaction mixture was allowed to stir at room temperature for 18 h and the resulting solution filtered through a Celite pad. The filtrate was pumped to dryness and the resulting yellow solid was washed three times with hexane. The powder was then dissolved in 10 mL of THF and placed in the freezer at -35 °C. Over a period of 24 h large yellow crystals were deposited. The crystals were isolated by decanting the mother liquor and allowing the crystals to dry in the drybox atmosphere. Total yield 0.770 g (58 %). 1H NMR (300 MHz, THF-*d8*): 11.81 (br s, 3 H, NH), 3.60 (br m, 12 H, -THF), 1.75 (br m, 12 H, -THF). IR (Nujol, cm-1): 3555 (w), 3312 (w), 1658 (m), 1641 (m), 1610 (w), 1506 (s), 1459 (s), 1377 (s), 1365 (m), 1351 (m), 1339 (s), 1293 (m), 1238 (s), (1226 (s), 1156 (m), 1123 (vw), 1108 (vw), 1068 (w), 997 (s), 959 (s), 918 (w), 869 (m), 780 (w), 722 (w), 710 (w), 673 (w), 618 (w), 586 (w), 564 (w), 464 (m), 407 (w). Anal. Calcd for C30H27F15N3O3Sm(C4H8O)0.5: C, 40.50; H, 3.29; N, 4.43. Found: C, 40.22; H, 3.44; N, 4.62.

**Sm[N(C6F5)(SiMe3)]3** (**3**). Sm[N(SiMe3)2]3 (0.500 g, 0.792 mmol) was dissolved in 10 mL of toluene and then N-trimethylsilylpentafluoroaniline (0.606 g, 2.376 mmol) was added. The reaction was allowed to stir at room temperature for 18 h and the resulting solution filtered through a Celite pad. The filtrate was pumped to dryness and the resulting orange solid was washed three times with hexane to produce a yellow powder. The powder was then re-dissolved in 10 mL of toluene, and the solution allowed to slowly evaporate in the drybox over a period of several days to produce orange crystals. Yield 0.25 g (35 %). 1H NMR (300 MHz, benzene-*d6*):  -2.63 (br s, SiMe3). 19F NMR (282 MHz, toluene-*d8*):  120.48 (t, J = 22.8 Hz, para F), 131.45 (d, J = 21.1 Hz, meta F), ~131 (v br, ortho F). IR (Nujol, cm-1): 3400 (w), 1654 (w), 1604 (w), 1523 (s), 1510 (s), 1442 (m), 1423 (m), 1397 (w), 1377 (w), 1366 (w), 1292 (w), 1252 (m), 1178 (w), 1168 (m), 1159 (w), 1140 (w), 1130 (w), 1110 (w), 1087 (vw), 1016 (s), 998 (m), 987 (m), 978 (s), 918 (vw), 847 (s), 808 (w), 755 (w), 735 (w), 720 (w), 683 (w), 668 (w). Anal. Calcd for SmC27H27N3F15Si3: C, 35.51; H, 2.98; N, 4. 60. Found: C, 34.89; H, 3.16; N, 4.79.

**(-C6H5Me)Nd[N(C6F5)2]3** (**5**). Nd[N(SiMe3)2]3 (0.500 g, 0.799 mmol) was dissolved in 10mL of toluene and then decafluorodiphenylamine (0.837 g, 2.397 mmol) was added. The reaction was allowed to stir at room temperature for 18 h and the resulting solution filtered through Celite pad. The filtrate was pumped to dryness and the resulting purple oil was triturated with hexane. The residual hexane was removed *in vacuo* to yield a purple/blue powder. The powder was then re-dissolved in 10 mL of toluene. Purple crystals could be obtained after several days in the freezer at -35 °C, or by slow evaporation of the solvent in the drybox. The crystals were isolated, washed with hexane and allowed to dry. Total yield 0.975g (95 %). Crystals were observed to powder on standing, presumably due to loss of the toluene solvent within the lattice. 1H NMR (300 MHz, benzene-*d6*): only resonances for the lattice toluene were observed at  2.10 and 7.10. IR (Nujol, cm-1): 3432 (w), 1659 (w), 1627 (w), 1594 (w), 1520 (s), 1516 (s), 1464 (s), 1377 (m), 1351 (w), 1366 (w), 1308 (w), 1275 (w), 1263 (w), 1190 (w), 1176 (w), 1105 (w), 1030 (s), 1001 (s), 981 (s), 950 (s), 887 (w), 826 (m), 777 (m), 651 (w), 595 (m), 575 (w), 568 (w). Anal. Calcd for C43H8F30N3Nd(C7H8)0.6: C, 42.43; H, 0.97; N, 3.15. Found: C, 42.43; H, 1.38; N, 3.88.

# References

1. A. J. Oliver and W. A. G. Graham, *J. Organomet. Chem.* 1969, **19**, 17.

2. R. Koppang, *Acta Chem. Scand.* 1971, **25**, 3067.
